# Supplementary material
Source: Springer Nature journal article supplement (https://www.springermedizin.de/resource/supplementary/12943_2009_561_MOESM8_ESM.pdf/9554974)

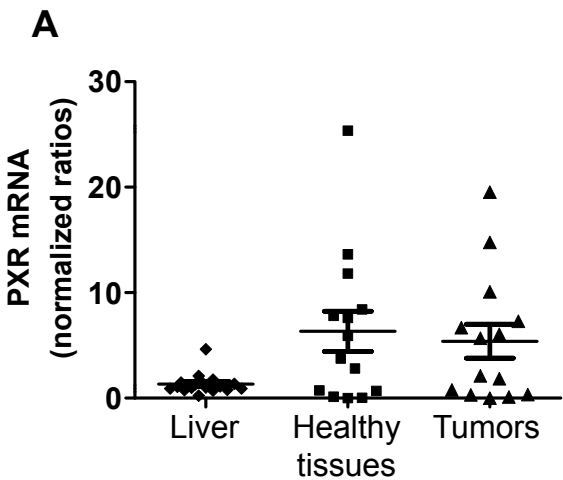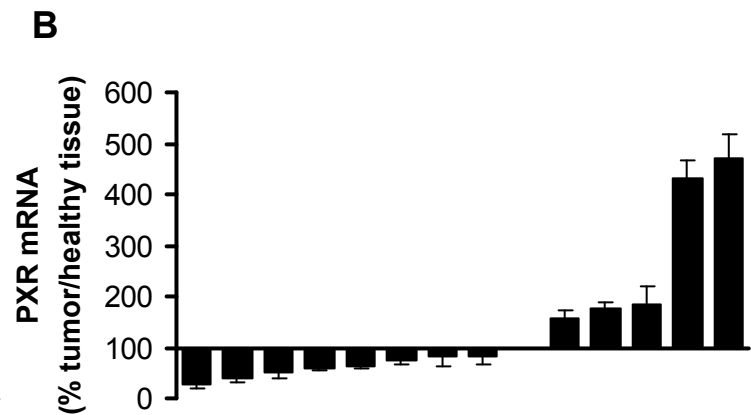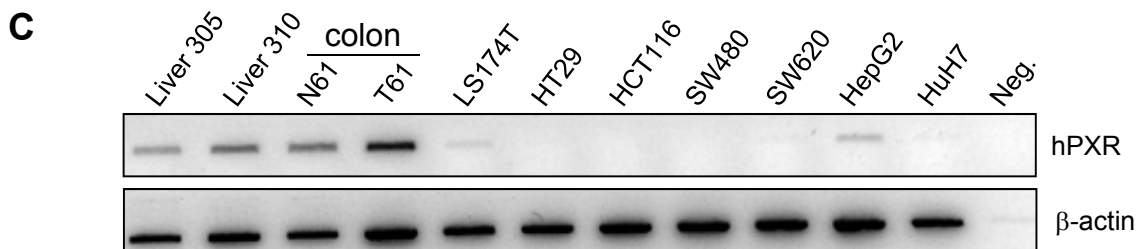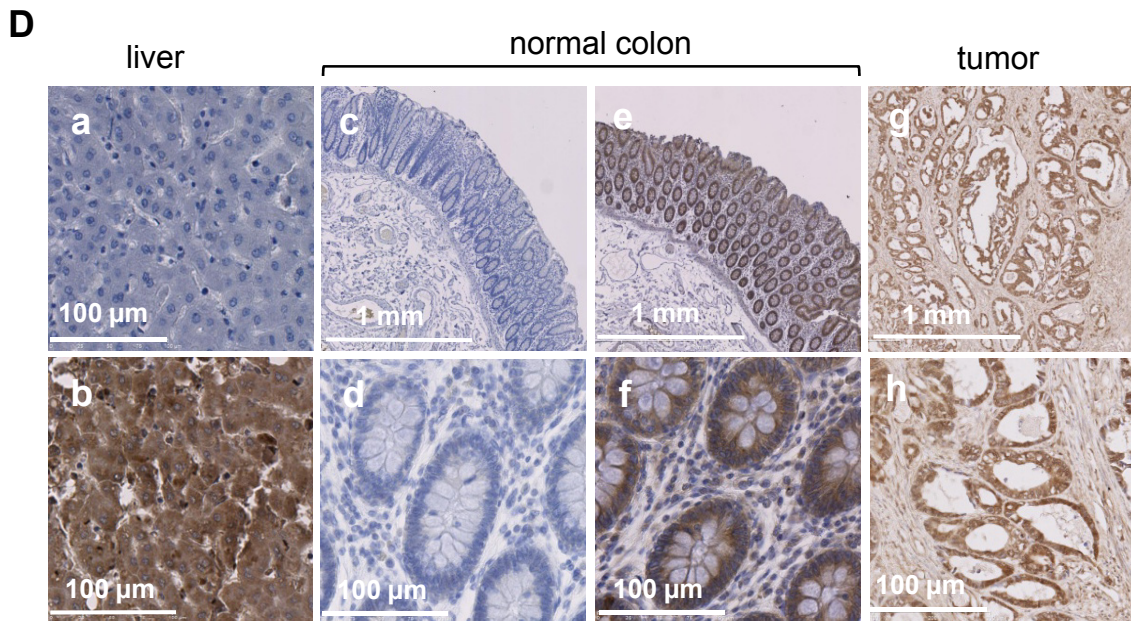

Supplement: MOESM8 [file 9554974]
